# Supplementary material for: Optical detection of downy mildew in grapevine leaves: daily kinetics of autofluorescence upon infection
Source: PubMed Central journal article supplement — J Exp Bot. 2012 Dec 3;64(1):333–41. doi: 10.1093/jxb/ers338 (PMC3528039; doi:10.1093/jxb/ers338), 2012-12-03
Supplement: supp_ers338_jexbot083337_file001.pdf [file supp_ers338_jexbot083337_file001.pdf]

**Bellow et al. (2012) J. Exp. Bot.**

Daily kinetics of autofluorescence in downy mildew infected grapevine leaves

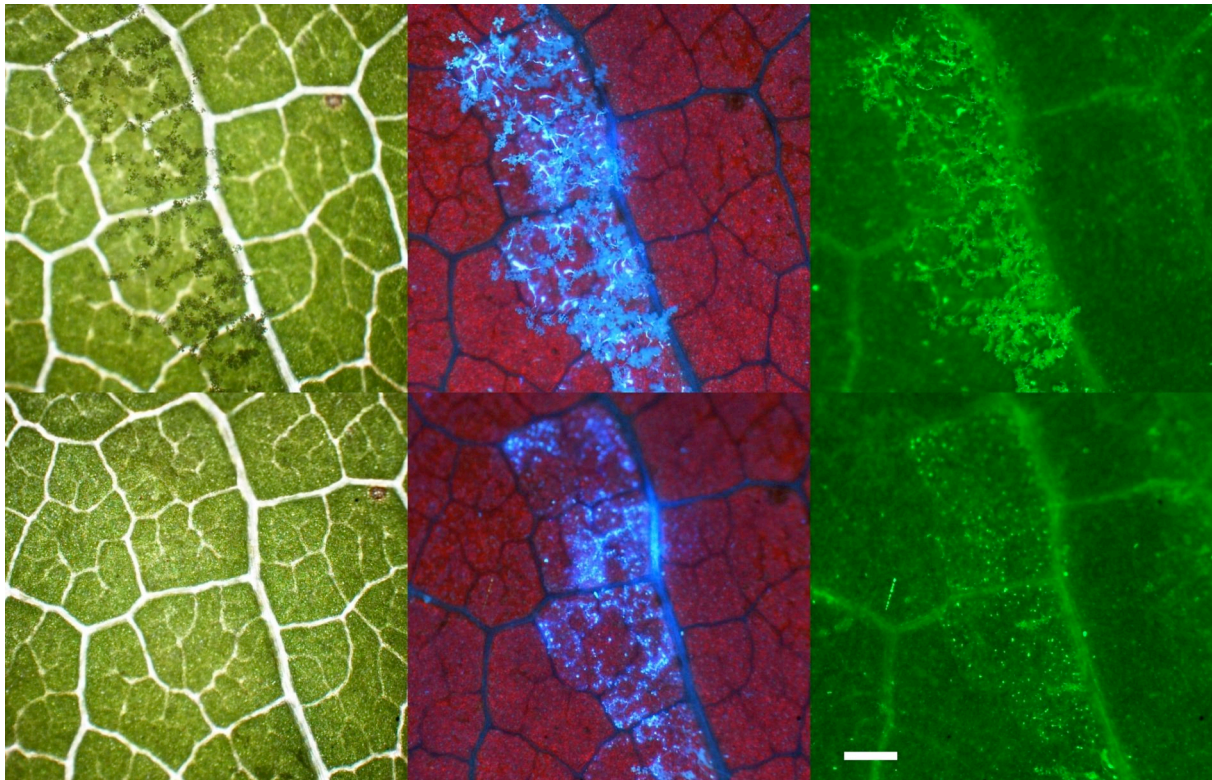

**Supplementary Fig. S1.** Images of sporulating leaves before and after removal of sporangiophores. Images of the abaxial side of an attached *V. vinifera* leaf before (top) and after sporangiophores were washed off (bottom). Left column, white-light transmission images; middle column, UV-excited visible autofluorescence images; right column, blue-excited green autofluorescence. Bar, 500  $\mu\text{m}$ .
